# Supplementary material
Source: Research Square preprint supplement (doi:10.21203/rs.3.rs-9155751/v1)
Supplement: Supplementary file 1 [file 932ec76e53f8ebe552be22bc.docx]

## Supplementary Material 1

## T2WI Sequence Parameters

| **Parameters** | **Siemens Amira 1.5T** | **Philips Achieva 1.5T** | **GE Discovery 750 3.0T** | **the United Imaging Medical Imaging** |
| --- | --- | --- | --- | --- |
| TR (ms) | 2100 | 334 | 8000 | 4500 |
| TE (ms) | 102 | 65 | 68.90 | 88.8 |
| NEX | 2 | 2 | 2 | 2 |
| Image thickness (mm) | 5.0 | 5.0 | 5.0 | 5.0 |
| Slice interval (mm) | 6 | 6 | 6 | 20 |
| Matrix | 128×83 | 124×124 | 128×130 | 320×320 |
| FOV (cm) | 38×38 | 40.2×40.2 | 40×40 | 35×35 |

## **D**WI Sequence Parameters

| **Parameters** | **Siemens Amira 1.5T** | **Philips Achieva 1.5T** | **GE Discovery 750 3.0T** | **the United Imaging Medical Imaging** |
| --- | --- | --- | --- | --- |
| TR (ms) | 3900 | 1574 | 7500 | 3075 |
| TE (ms) | 66 | 64 | 80 | 87.4 |
| NEX | 2 | 6 | 6 | 6 |
| Image thickness (mm) | 5.0 | 7.0 | 5.0 | 5.0 |
| Slice interval (mm) | 6 | 8 | 6 | 20 |
| Matrix | 128×83 | 124×124 | 128×130 | 128×130 |
| FOV (cm) | 38×38 | 37.5×37.5 | 40×40 | 38×30 |
